# Degradation of cyclin B is critical for nuclear division in

## *Trypanosoma brucei*

Hanako Hayashi and Bungo Akiyoshi\*

Department of Biochemistry, University of Oxford, Oxford, UK

\*Correspondence: [bungo.akiyoshi@bioch.ox.ac.uk](mailto:bungo.akiyoshi@bioch.ox.ac.uk)

### Abstract

Kinetoplastids have a nucleus that contains the nuclear genome and a kinetoplast that contains the mitochondrial genome. These single-copy organelles must be duplicated and segregated faithfully to daughter cells at each cell division. In *Trypanosoma brucei*, although duplication of both organelles starts around the same time, segregation of the kinetoplast precedes that of the nucleus. Cytokinesis subsequently takes place so that daughter cells inherit a single copy of each organelle. Very little is known about the molecular mechanism that governs the timing of these events. Furthermore, it is thought that *T. brucei* lacks a spindle checkpoint that delays the onset of nuclear division in response to spindle damage. Here we show that a mitotic cyclin CYC6 has a dynamic localization pattern during the cell cycle, including kinetochore localization from G2 to metaphase. Using CYC6 as a molecular cell cycle marker, we confirmed that *T. brucei* cannot delay the onset of anaphase in response to a bipolar spindle assembly defect. Interestingly, expression of a stabilized form of CYC6 caused the nucleus to arrest in a metaphase-like state without preventing cytokinesis. We propose that trypanosomes have an ability to regulate the timing of nuclear division by modulating the CYC6 protein level, without a spindle checkpoint.

### Keywords

Cell cycle, spindle checkpoint, kinetoplastid, *Trypanosoma brucei*, kinetochore, cyclin B

## 29 **Introduction**

30 Accurate transmission of genetic material to offspring is essential for the survival of  
31 organisms. The genome in eukaryotes exists in different organelles such as the  
32 nucleus, mitochondria, and plastids. Nuclear DNA is duplicated during S phase and  
33 segregated equally to daughter cells during M phase. Kinetochores are the  
34 macromolecular protein complexes that assemble onto centromeric DNA and interact  
35 with spindle microtubules. It is essential that sister kinetochores attach to spindle  
36 microtubules emanating from opposite poles in metaphase so that sister chromatids  
37 segregate away from each other during anaphase. Cells possess a surveillance  
38 mechanism, called the spindle checkpoint, that delays the onset of anaphase in  
39 response to defects in kinetochore-microtubule attachments (London and Biggins  
40 2014; Musacchio 2015). Once all sister kinetochores have achieved proper bi-oriented  
41 attachments, the spindle checkpoint is satisfied. This results in the ubiquitylation of  
42 two key targets cyclin B and securin by the anaphase-promoting complex (APC/C),  
43 leading to their destruction by proteasomes.

44 In contrast to nuclear DNA, the mechanism of mitochondrial DNA  
45 transmission varies among eukaryotes. For example, in animals that have a high copy  
46 number of mitochondria, transmission of mitochondrial DNA is thought to occur  
47 randomly (Westermann 2010). On the other hand, a single mitochondrion is present in  
48 many unicellular eukaryotes, such as kinetoplastids, *Plasmodium falciparum* and  
49 *Cyanidioschyzon merolae* (Robinson and Gull 1991; Itoh et al. 1997; Okamoto et al.  
50 2009). The timing of duplication and partition of their mitochondria must be  
51 coordinated with the cell cycle machinery in these organisms. Kinetoplastids are a  
52 group of unicellular organisms that are characterized by the unique structure called  
53 the kinetoplast, which is a network of multiple copies of mitochondrial DNA (termed  
54 the kDNA) enclosed in a single mitochondrion (Vickerman 1962). They are  
55 evolutionarily divergent from commonly studied model eukaryotes (e.g. yeast,  
56 worms, flies, and humans) (Cavalier-Smith 2010; Walker et al. 2011), so  
57 understanding their biology can provide insights into the extent of conservation or  
58 divergence in eukaryotes. Among various kinetoplastids studied thus far, the  
59 mechanism of cell cycle is best characterized in *Trypanosoma brucei*, the causative  
60 agent of human African trypanosomiasis (for reviews, see (McKean 2003;  
61 Hammarton 2007; Vaughan and Gull 2008; Li 2012)). *T. brucei* has a canonical cell  
62 cycle for nuclear events (G1, S, G2, and M phases). G1 cells have a single kinetoplast

63 and nucleus (termed 1K1N). Duplication of kinetoplast DNA starts almost  
64 simultaneously with that of nuclear DNA, but completes earlier (Woodward and Gull  
65 1990; Siegel et al. 2008). Segregation of kDNA depends on that of basal bodies and  
66 occurs during the nuclear S phase, creating 2K1N cells (Robinson and Gull 1991;  
67 Ogbadoyi et al. 2003). Trypanosomes do not break down their nuclear envelope  
68 (closed mitosis), and an intranuclear mitotic spindle is assembled in the nucleus  
69 during M phase (Vickerman and Preston 1970; Ogbadoyi et al. 2000). Sister  
70 kinetochores align at the metaphase plate during metaphase, followed by the  
71 separation of nuclear DNA in anaphase (creating 2K2N cells) and split of cells by  
72 cytokinesis (Sherwin and Gull 1989; Woodward and Gull 1990). It is essential that  
73 replication and segregation of these organelles occur prior to cytokinesis in a  
74 coordinated manner so that daughter cells inherit a copy of each. Little is known  
75 about the underlying molecular mechanism.

76 Available evidence suggests that *T. brucei* is not capable of halting their cell  
77 cycle in response to various defects in the nucleus. For example, when bipolar spindle  
78 assembly is blocked in procyclic (insect form) cells, they undergo cytokinesis without  
79 a noticeable delay despite a lack of nuclear division (Robinson et al. 1995; Ploubidou  
80 et al. 1999). This results in the formation of one daughter cell that has one kinetoplast  
81 DNA without nuclear DNA (1K0N, termed zoid) and another cell that has one  
82 kinetoplast with tetraploid DNA content, suggesting that the spindle checkpoint is not  
83 operational (Ploubidou et al. 1999). In fact, most of the spindle checkpoint  
84 components (i.e. Mps1, Mad1, Mad3/BubR1, Bub1, Bub3) are not found in *T. brucei*  
85 or other kinetoplastids. Although a Mad2 homolog is present, this protein localizes at  
86 basal bodies, not kinetochores (Akiyoshi and Gull 2013). It is therefore thought that  
87 trypanosomes cannot delay cytokinesis even when nuclear division fails to occur. Yet,  
88 there must be a mechanism to coordinate the segregation of nuclear DNA with  
89 cytokinesis in unperturbed cells. One possibility is the presence of a cell cycle  
90 oscillator that triggers cell cycle events in a set sequence even without feedback  
91 control systems. The best characterized components of cell cycle oscillators are  
92 cyclin/CDK (cyclin-dependent kinase) complexes (Nurse 1990; Morgan 1997; Gérard  
93 et al. 2015). The rise and fall of their kinase activities trigger cell cycle events in a set  
94 sequence. For example, increased activities of mitotic CDK complexes promote entry  
95 into M phase and various mitotic events, whereas their decrease is essential for exit  
96 from mitosis. *T. brucei* has ten cyclins and eleven CDKs, among which CYC6/CRK3

97 is the major mitotic cyclin/CDK complex in *T. brucei* (CYC6 is also known as  
98 CycB2) (Li and Wang 2003; Hammarton et al. 2003). When degradation of CYC6  
99 was inhibited by proteasome inhibitors or APC/C downregulation, cells accumulated  
100 in a metaphase-like state with a bipolar spindle (Mutomba et al. 1997; Kumar and  
101 Wang 2005). These observations suggested that degradation of cyclin B could be a  
102 trigger for the metaphase-anaphase transition. Here we directly tested this possibility  
103 by expressing a non-degradable version of CYC6 in *T. brucei*.

104

## 105 **Results**

### 106 **Identification of cyclin B<sup>CYC6</sup> as a molecular cell cycle marker**

107 Cellular localization of CYC6 has not been reported thus far, so we first examined it  
108 by endogenously tagging CYC6 with an N-terminal YFP tag in *T. brucei* procyclic  
109 cells. We observed the following localization pattern (Figure 1A). There was no  
110 distinct signal in G1 cells. From S phase onwards, CYC6 was found at the basal body  
111 area and flagellum. From G2 to metaphase, nuclear signal was observed with  
112 significant enrichment at kinetochore regions in metaphase. In fact, these nuclear dots  
113 co-localized with a kinetochore marker protein, KKT2 (Figure 1B). CYC6  
114 disappeared from the nucleus in anaphase. We obtained similar results for CRK3,  
115 which formed dots in metaphase and disappeared in anaphase (Figure 1C). Thus,  
116 CYC6 and CRK3 exhibit a differential localization pattern depending on cell cycle  
117 stages, and can therefore be used as a molecular cell cycle marker.

118

### 119 **Cyclin B<sup>CYC6</sup> is important for bipolar spindle assembly, but not for kinetochore 120 assembly**

121 CDK activities are known to be important for kinetochore assembly in some  
122 eukaryotes, including humans (Gascoigne and Cheeseman 2013). The finding that  
123 CYC6 localizes at kinetochores from G2 to metaphase in trypanosomes prompted us  
124 to study its importance for kinetochore assembly. We therefore depleted CYC6 by  
125 RNAi-mediated knockdown (Ngô et al. 1998). We confirmed that CYC6 is essential  
126 for cell growth, as previously reported (Li and Wang 2003; Hammarton et al. 2003)  
127 (data not shown). Because cyclin/CDK activities are known to be important for  
128 various mitotic events (Bishop et al. 2000), we first examined bipolar spindle  
129 formation. We used a spindle marker protein that we identified from our previous  
130 tagging screen (ORF Tb927.11.14370) (Archer et al. 2011; Akiyoshi and Gull 2014).

131 This protein had a localization pattern characteristic of spindle microtubules, so we  
132 named it MAP103 for microtubule-associated protein 103 kDa (Figure S1). We  
133 observed defective spindle microtubules in CYC6-depleted cells, suggesting that  
134 CDK activities are essential for proper bipolar spindle assembly (Figure 2A). Under  
135 these conditions, however, localization of all KKT proteins we examined was not  
136 affected (KKT1, KKT4, KKT7, KKT8, KKT10, KKT14, KKT16) (Figure 2B).  
137 Therefore, CYC6 is dispensable for the assembly of these kinetochore proteins in  
138 procyclic cells.

139

#### 140 **Cells fail to delay the onset of anaphase in response to spindle defects**

141 We next used CYC6 as a molecular cell cycle marker to examine the effect of drugs.  
142 We first used an anti-microtubule agent, ansamitocin, to examine the effect of a  
143 bipolar spindle assembly defect for cell cycle progression (Robinson and Gull 1991).  
144 By testing various concentrations of ansamitocin, we found that 5 nM of ansamitocin  
145 significantly slowed down cell growth (Figure 3A). After a 4-hr treatment, nuclear  
146 division and bipolar spindle assembly was perturbed as expected (Figure 3B). In this  
147 condition, however, we found no significant enrichment of nuclear CYC6-positive  
148 cells (Figure 3C). This corroborates previous studies (Ploubidou et al. 1999) and  
149 confirms that trypanosomes are not capable of delaying the onset of anaphase in  
150 response to spindle damage.

151

#### 152 **Stabilization of cyclin B<sup>CYC6</sup> causes metaphase arrest in the nucleus**

153 We next examined the effect of cyclin B stabilization for cell cycle progression. We  
154 first used a proteasome inhibitor MG-132 that blocked cell cycle progression and  
155 stabilized the CYC6 protein (Mutomba et al. 1997; Bessat et al. 2013). When cells  
156 expressing YFP-CYC6 were treated with 10  $\mu$ M MG-132 for 4 hr, ~30% of cells had  
157 nuclear CYC6 signal (compared to ~10 % in control), suggesting that the nucleus  
158 arrested prior to anaphase (Figure 4A, B). Indeed, these cells had a bipolar spindle  
159 (often elongated) and most of their kinetochores were aligned at the metaphase plate  
160 (Figure 4C, D). We also noted that the distance between the two kinetoplast DNA in  
161 these cells was often greater than that in control metaphase cells. These results  
162 suggest that, upon MG-132 treatment, trypanosomes arrest the nucleus in a  
163 metaphase-like state in which cyclin B is not degraded, although their cytoplasm  
164 transits to an anaphase-like state.

165           Because MG-132 treatment affects the protein level of many other proteins,  
166 we next tested whether the presence of cyclin B in the nucleus is sufficient to prevent  
167 nuclear division. Overexpression of wild-type CYC6 did not affect cell growth (data  
168 not shown). We therefore expressed a GFP-NLS fusion of a non-degradable form of  
169 CYC6 (CYC6<sup>Δ1-57</sup>). Interestingly, we detected a decrease in 2K2N cells and  
170 accumulation of 2K1N cells upon expression of non-degradable CYC6 for 8 hr  
171 (Figure 4E), suggesting that the nucleus was arrested in a metaphase-like state.  
172 Indeed, kinetochores were aligned at the metaphase plate in these cells (Figure 4F).  
173 We also detected a significant increase in the number of zoids (1K0N cells). This  
174 implies that cytokinesis occurred despite the lack of nuclear division (Figure 4E, F).  
175 These results show that CYC6 is capable of arresting the nucleus in a metaphase-like  
176 state, although it cannot stop cytokinesis. Taken together, our data show that  
177 trypanosomes have an ability to control the timing of nuclear division by modulating  
178 the degradation of a mitotic cyclin in the nucleus.

179

## 180 **Discussion**

181 Previous studies observed the formation of zoids despite a lack of nuclear division  
182 due to spindle damage (Ploubidou et al. 1999), cyclin/CDK depletion (Hammarton et  
183 al. 2003; Li and Wang 2003; Tu and Wang 2004), or expression of a non-degradable  
184 cohesin subunit SCC1 (Gluezn et al. 2008). These studies strongly suggested that *T.*  
185 *brucei* cannot prevent cytokinesis in response to a lack of nuclear division at least in  
186 procyclic cells (although this is likely to be the case in bloodstream form too, see  
187 (Gluezn et al. 2008)). In this study, we established CYC6 as a molecular marker for  
188 cell cycle progression, and confirmed that trypanosomes indeed failed to delay the  
189 anaphase onset in response to spindle damage. This implies that the timing  
190 mechanism of the nuclear cell cycle progression is likely governed by an intrinsic cell  
191 cycle timer, as observed in embryonic divisions (Yang and Ferrell 2013; Yuan and  
192 O'Farrell 2015) and in spindle checkpoint mutants of yeasts and flies (Hoyt et al.  
193 1991; Li and Murray 1991; Buffin et al. 2007).

194           Interestingly, we found that expression of non-degradable cyclin B can delay  
195 the onset of anaphase (in the nucleus). This means that trypanosomes could  
196 potentially coordinate the timing of nuclear division with that of cytokinesis by  
197 regulating the level of the CYC6 protein in the nucleus. Because APC/C is  
198 responsible for the degradation of mitotic cyclins, understanding its regulatory



199 mechanism is of critical importance. It is interesting to note that two kinetochore  
200 proteins (KKT4 and KKT20) co-purified with several components of the APC/C  
201 (Akiyoshi and Gull 2014; Nerusheva and Akiyoshi 2016), suggesting that  
202 kinetochores may directly regulate APC/C activities. It will be important to  
203 understand the underlying mechanism.

204 It remains unclear how the timing of cytokinesis onset is determined in  
205 trypanosomes. It has been suggested that it may be the segregation of basal bodies,  
206 rather than that of the nucleus, that is linked to cytokinesis in trypanosomes  
207 (Ploubidou et al. 1999). Interestingly, CYC6 signal was found not only at  
208 kinetochores but also at basal bodies and flagella. Therefore, CYC6 might also have  
209 an ability to regulate the onset of cytokinesis, which will need to be tested in future  
210 studies.

211

212

### 213 **Supplemental material**

214 Supplemental material contains Figure S1, and Tables S1, S2, and S3.

215

### 216 **Materials and methods**

#### 217 **Trypanosome cells**

218 All trypanosome cell lines used in this study were derived from *T. brucei* SmOxP927  
219 procyclic form cells (TREU 927/4 expressing T7 RNA polymerase and the tetracy-  
220 cline repressor to allow inducible expression) (Poon et al. 2012) and are listed in  
221 Table S1. Cells were grown at 28 °C in SDM-79 medium supplemented with 10%  
222 (v/v) heat-inactivated fetal calf serum (Brun and Schönenberger 1979). Cell growth  
223 was monitored using a CASY cell counter and analyzer system (Roche). RNAi was  
224 induced with doxycycline at a final concentration of 1 µg/ml. Non-degradable CYC6  
225 was expressed with doxycycline at 0.1 µg/ml. Ansamitocin P-3 was purchased from  
226 Abcam (catalog number, ab144546) and MG-132 was purchased from Merck (catalog  
227 number, 474790).

228

#### 229 **Tagging, cloning, transfections, and microscopy**

230 Plasmids and primers used in this study are listed in Table S2 and S3, respectively.

231 Endogenous tdTomato tagging was performed using pBA148 (Akiyoshi and Gull

232 2014). YFP tagging was performed using pEnT5-Y (for KKTs and MAP103) or

233 pBA106 (for CYC6 and CRK3) tagging vectors. pBA106 is a modified version of the  
234 pEnT5-Y vector (Kelly et al. 2007) to allow N-terminal 3FLAG-6HIS-YFP tagging.  
235 A targeting sequence for the CRK3 tagging (consisting of *Xba*I site, 4–250 bp of the  
236 CRK3 coding sequence, *Not*I site, 250 bp of CRK3 5'UTR, *Bam*HI site) was  
237 synthesized by GeneArt. To make pBA106, a synthetic DNA fragment that encodes a  
238 3FLAG-6HIS tag (made by annealing BA403 and BA404) was ligated into pEnT5-Y  
239 using *Hind*III and *Spe*I sites. For generation of the inducible CYC6 RNAi cell line,  
240 424 bp fragment targeting 378–801 bp of the CYC6 coding sequence was amplified  
241 from genomic DNA and cloned into the p2T7-177 vector (Wickstead et al. 2002),  
242 creating pBA734. To make a non-degradable version of CYC6 with an N-terminal  
243 GFP-NLS tag (pBA1319: GFP-NLS-CYC6<sup>Δ1–57</sup>), DNA fragment encoding CYC6<sup>58–</sup>  
244 <sup>426</sup> was amplified from genomic DNA and cloned into pBA310 (Nerusheva and  
245 Akiyoshi 2016) using *Pac*I and *Asc*I sites. Plasmids linearized by *Not*I were  
246 transfected to trypanosomes by electroporation into an endogenous locus (pEnT5-Y,  
247 pBA106, and pBA148 derivatives) or 177 bp repeats on minichromosomes (p2T7-177  
248 and pBA310 derivatives). Transfected cells were selected by the addition of 25 μg/ml  
249 hygromycin (pEnT5-Y and pBA106 derivatives), 10 μg/ml blasticidin (pBA148  
250 derivatives), or 5 μg/ml phleomycin (p2T7-177 and pBA310 derivatives). Microscopy  
251 was performed essentially as previously described using a Leica DM5500 B  
252 microscope (Leica Microsystems) housed in the Keith Gull's laboratory (Akiyoshi  
253 and Gull 2014) to image YFP-MAP103 or DeltaVision fluorescence microscope  
254 (Applied Precision) housed in the Micron Oxford Advanced Bioimaging Unit  
255 (Nerusheva and Akiyoshi 2016) for all other experiments.

256

## 257 **Acknowledgments**

258 We thank Keith Gull for discussion, and Bela Novak, Olga Nerusheva, Gabriele  
259 Marcianò, Midori Kanazawa, and Patryk Ludzia for comments on the manuscript. We  
260 also thank the Micron Oxford Advanced Bioimaging Unit. H.H. was supported by a  
261 Uehara Memorial Foundation fellowship. B.A. was supported by a Sir Henry Dale  
262 Fellowship jointly funded by the Wellcome Trust and the Royal Society (grant  
263 number 098403/Z/12/Z), Wellcome-Beit Prize Fellowship (grant number  
264 098403/Z/12/A), and the EMBO Young Investigator Program.

265

## 266 **Competing interests**



267 The authors declare no competing or financial interests.

268

### 269 **Author's contributions**

270 B.A. conceived and designed the project. H.H. performed experiments for Figure 1B  
271 and Figure 4E, 4F. B.A. performed the rest of experiments, analyzed data, and wrote  
272 the manuscript.

273

274

### 275 **References**

276 **Akiyoshi B., Gull K.** (2013) Evolutionary cell biology of chromosome segregation:  
277 insights from trypanosomes. *Open Biol* **3**, 130023. doi: 10.1098/rsob.130023

278 **Akiyoshi B., Gull K.** (2014) Discovery of unconventional kinetochores in  
279 kinetoplastids. *Cell* **156**, 1247–1258. doi: 10.1016/j.cell.2014.01.049

280 **Archer S. K., Inchaustegui D., Queiroz R., Clayton C.** (2011) The cell cycle  
281 regulated transcriptome of *Trypanosoma brucei*. *PLoS ONE* **6**, e18425. doi:  
282 10.1371/journal.pone.0018425

283 **Bessat M., Knudsen G., Burlingame A. L., Wang C. C.** (2013) A minimal  
284 anaphase promoting complex/cyclosome (APC/C) in *Trypanosoma brucei*.  
285 *PLoS ONE* **8**, e59258. doi: 10.1371/journal.pone.0059258

286 **Bishop A. C., Ubersax J. A., Petsch D. T., Matheos D. P., Gray N. S., Blethrow J.,**  
287 **Shimizu E., Tsien J. Z., Schultz P. G., Rose M. D., et al.** (2000) A chemical  
288 switch for inhibitor-sensitive alleles of any protein kinase. *Nature* **407**, 395–  
289 401. doi: 10.1038/35030148

290 **Brun R., Schönenberger** (1979) Cultivation and in vitro cloning or procyclic culture  
291 forms of *Trypanosoma brucei* in a semi-defined medium. Short  
292 communication. *Acta Trop* **36**, 289–292.

293 **Buffin E., Emre D., Karess R. E.** (2007) Flies without a spindle checkpoint. *Nat Cell*  
294 *Biol* **9**, 565–572. doi: 10.1038/ncb1570

295 **Cavalier-Smith T.** (2010) Kingdoms Protozoa and Chromista and the eozoan root of  
296 the eukaryotic tree. *Biol Lett* **6**, 342–345. doi: 10.1098/rsbl.2009.0948

297 **Gascoigne K. E., Cheeseman I. M.** (2013) CDK-dependent phosphorylation and  
298 nuclear exclusion coordinately control kinetochore assembly state. *J Cell Biol*  
299 **201**, 23–32. doi: 10.1083/jcb.201301006

300 **Gérard C., Tyson J. J., Coudreuse D., Novák B.** (2015) Cell cycle control by a  
301 minimal Cdk network. *PLoS Comput Biol* **11**, e1004056. doi:  
302 10.1371/journal.pcbi.1004056

- 303 **Gluezn E., Sharma R., Carrington M., Gull K.** (2008) Functional characterization  
304 of cohesin subunit SCC1 in *Trypanosoma brucei* and dissection of mutant  
305 phenotypes in two life cycle stages. *Mol Microbiol* **69**, 666–680. doi:  
306 10.1111/j.1365-2958.2008.06320.x
- 307 **Hammarton T. C.** (2007) Cell cycle regulation in *Trypanosoma brucei*. *Mol*  
308 *Biochem Parasitol* **153**, 1–8. doi: 10.1016/j.molbiopara.2007.01.017
- 309 **Hammarton T. C., Clark J., Douglas F., Boshart M., Mottram J. C.** (2003) Stage-  
310 specific differences in cell cycle control in *Trypanosoma brucei* revealed by  
311 RNA interference of a mitotic cyclin. *J Biol Chem* **278**, 22877–22886. doi:  
312 10.1074/jbc.M300813200
- 313 **Hoyt M. A., Totis L., Roberts B. T.** (1991) *S. cerevisiae* genes required for cell  
314 cycle arrest in response to loss of microtubule function. *Cell* **66**, 507–517.
- 315 **Itoh R., Takahashi H., Toda K., Kuroiwa H., Kuroiwa T.** (1997) Checkpoint  
316 control on mitochondrial division in *Cyanidioschyzon merolae*. *Protoplasma*  
317 **196**, 135–141. doi: 10.1007/BF01279562
- 318 **Kelly S., Reed J., Kramer S., Ellis L., Webb H., Sunter J., Salje J., Marinsek N.,**  
319 **Gull K., Wickstead B., et al.** (2007) Functional genomics in *Trypanosoma*  
320 *brucei*: a collection of vectors for the expression of tagged proteins from  
321 endogenous and ectopic gene loci. *Mol Biochem Parasitol* **154**, 103–109. doi:  
322 10.1016/j.molbiopara.2007.03.012
- 323 **Kumar P., Wang C. C.** (2005) Depletion of anaphase-promoting complex or  
324 cyclosome (APC/C) subunit homolog APC1 or CDC27 of *Trypanosoma*  
325 *brucei* arrests the procyclic form in metaphase but the bloodstream form in  
326 anaphase. *J Biol Chem* **280**, 31783–31791. doi: 10.1074/jbc.M504326200
- 327 **Li R., Murray A. W.** (1991) Feedback control of mitosis in budding yeast. *Cell* **66**,  
328 519–531.
- 329 **Li Z.** (2012) Regulation of the cell division cycle in *Trypanosoma brucei*. *Eukaryotic*  
330 *Cell*. doi: 10.1128/EC.00145-12
- 331 **Li Z., Wang C. C.** (2003) A PHO80-like cyclin and a B-type cyclin control the cell  
332 cycle of the procyclic form of *Trypanosoma brucei*. *J Biol Chem* **278**, 20652–  
333 20658. doi: 10.1074/jbc.M301635200
- 334 **London N., Biggins S.** (2014) Signalling dynamics in the spindle checkpoint  
335 response. *Nat Rev Mol Cell Biol* **15**, 736–747. doi: 10.1038/nrm3888
- 336 **McKean P. G.** (2003) Coordination of cell cycle and cytokinesis in *Trypanosoma*  
337 *brucei*. *Curr Opin Microbiol* **6**, 600–607.
- 338 **Morgan D. O.** (1997) Cyclin-dependent kinases: engines, clocks, and  
339 microprocessors. *Annu Rev Cell Dev Biol* **13**, 261–291. doi:  
340 10.1146/annurev.cellbio.13.1.261

- 341 **Musacchio A.** (2015) The Molecular Biology of Spindle Assembly Checkpoint  
342 Signaling Dynamics. *Curr Biol* **25**, R1002-1018. doi:  
343 10.1016/j.cub.2015.08.051
- 344 **Mutomba M. C., To W. Y., Hyun W. C., Wang C. C.** (1997) Inhibition of  
345 proteasome activity blocks cell cycle progression at specific phase boundaries  
346 in African trypanosomes. *Mol Biochem Parasitol* **90**, 491–504.
- 347 **Nerusheva O. O., Akiyoshi B.** (2016) Divergent polo box domains underpin the  
348 unique kinetoplast kinetochore. *Open Biol* **6**, 150206. doi:  
349 10.1098/rsob.150206
- 350 **Ngô H., Tschudi C., Gull K., Ullu E.** (1998) Double-stranded RNA induces mRNA  
351 degradation in *Trypanosoma brucei*. *Proc Natl Acad Sci USA* **95**, 14687–  
352 14692.
- 353 **Nurse P.** (1990) Universal control mechanism regulating onset of M-phase. *Nature*  
354 **344**, 503–508. doi: 10.1038/344503a0
- 355 **Ogbadoyi E., Ersfeld K., Robinson D., Sherwin T., Gull K.** (2000) Architecture of  
356 the *Trypanosoma brucei* nucleus during interphase and mitosis. *Chromosoma*  
357 **108**, 501–513.
- 358 **Ogbadoyi E. O., Robinson D. R., Gull K.** (2003) A high-order trans-membrane  
359 structural linkage is responsible for mitochondrial genome positioning and  
360 segregation by flagellar basal bodies in trypanosomes. *Mol Biol Cell* **14**,  
361 1769–1779. doi: 10.1091/mbc.E02-08-0525
- 362 **Okamoto N., Spurck T. P., Goodman C. D., McFadden G. I.** (2009) Apicoplast  
363 and Mitochondrion in Gametocytogenesis of *Plasmodium falciparum*.  
364 *Eukaryotic Cell* **8**, 128–132. doi: 10.1128/EC.00267-08
- 365 **Ploubidou A., Robinson D. R., Docherty R. C., Ogbadoyi E. O., Gull K.** (1999)  
366 Evidence for novel cell cycle checkpoints in trypanosomes: kinetoplast  
367 segregation and cytokinesis in the absence of mitosis. *J Cell Sci* **112 ( Pt 24)**,  
368 4641–4650.
- 369 **Poon S. K., Peacock L., Gibson W., Gull K., Kelly S.** (2012) A modular and  
370 optimized single marker system for generating *Trypanosoma brucei* cell lines  
371 expressing T7 RNA polymerase and the tetracycline repressor. *Open Biol* **2**,  
372 110037. doi: 10.1098/rsob.110037
- 373 **Robinson D. R., Gull K.** (1991) Basal body movements as a mechanism for  
374 mitochondrial genome segregation in the trypanosome cell cycle. *Nature* **352**,  
375 731–733. doi: 10.1038/352731a0
- 376 **Robinson D. R., Sherwin T., Ploubidou A., Byard E. H., Gull K.** (1995)  
377 Microtubule polarity and dynamics in the control of organelle positioning,  
378 segregation, and cytokinesis in the trypanosome cell cycle. *J Cell Biol* **128**,  
379 1163–1172.

- 380 **Sherwin T., Gull K.** (1989) The cell division cycle of *Trypanosoma brucei brucei*:  
381 timing of event markers and cytoskeletal modulations. *Philos Trans R Soc*  
382 *Lond, B, Biol Sci* **323**, 573–588.
- 383 **Siegel T. N., Hekstra D. R., Cross G. A. M.** (2008) Analysis of the *Trypanosoma*  
384 *brucei* cell cycle by quantitative DAPI imaging. *Mol Biochem Parasitol* **160**,  
385 171–174. doi: 10.1016/j.molbiopara.2008.04.004
- 386 **Tu X., Wang C. C.** (2004) The involvement of two cdc2-related kinases (CRKs) in  
387 *Trypanosoma brucei* cell cycle regulation and the distinctive stage-specific  
388 phenotypes caused by CRK3 depletion. *J Biol Chem* **279**, 20519–20528. doi:  
389 10.1074/jbc.M312862200
- 390 **Vaughan S., Gull K.** (2008) The structural mechanics of cell division in  
391 *Trypanosoma brucei*. *Biochem Soc Trans* **36**, 421–424. doi:  
392 10.1042/BST0360421
- 393 **Vickerman K.** (1962) The mechanism of cyclical development in trypanosomes of  
394 the *Trypanosoma brucei* sub-group: an hypothesis based on ultrastructural  
395 observations. *Trans R Soc Trop Med Hyg* **56**, 487–495.
- 396 **Vickerman K., Preston T. M.** (1970) Spindle microtubules in the dividing nuclei of  
397 trypanosomes. *J Cell Sci* **6**, 365–383.
- 398 **Walker G., Dorrell R. G., Schlacht A., Dacks J. B.** (2011) Eukaryotic systematics:  
399 a user's guide for cell biologists and parasitologists. *Parasitology* **138**, 1638–  
400 1663. doi: 10.1017/S0031182010001708
- 401 **Westermann B.** (2010) Mitochondrial fusion and fission in cell life and death. *Nat*  
402 *Rev Mol Cell Biol* **11**, 872–884. doi: 10.1038/nrm3013
- 403 **Wickstead B., Ersfeld K., Gull K.** (2002) Targeting of a tetracycline-inducible  
404 expression system to the transcriptionally silent minichromosomes of  
405 *Trypanosoma brucei*. *Mol Biochem Parasitol* **125**, 211–216.
- 406 **Woodward R., Gull K.** (1990) Timing of nuclear and kinetoplast DNA replication  
407 and early morphological events in the cell cycle of *Trypanosoma brucei*. *J*  
408 *Cell Sci* **95 ( Pt 1)**, 49–57.
- 409 **Yang Q., Ferrell J. E.** (2013) The Cdk1-APC/C cell cycle oscillator circuit functions  
410 as a time-delayed, ultrasensitive switch. *Nat Cell Biol* **15**, 519–525. doi:  
411 10.1038/ncb2737
- 412 **Yuan K., O'Farrell P. H.** (2015) Cyclin B3 is a mitotic cyclin that promotes the  
413 metaphase-anaphase transition. *Curr Biol* **25**, 811–816. doi:  
414 10.1016/j.cub.2015.01.053

415

416 **Figures and legends**

Figure 1

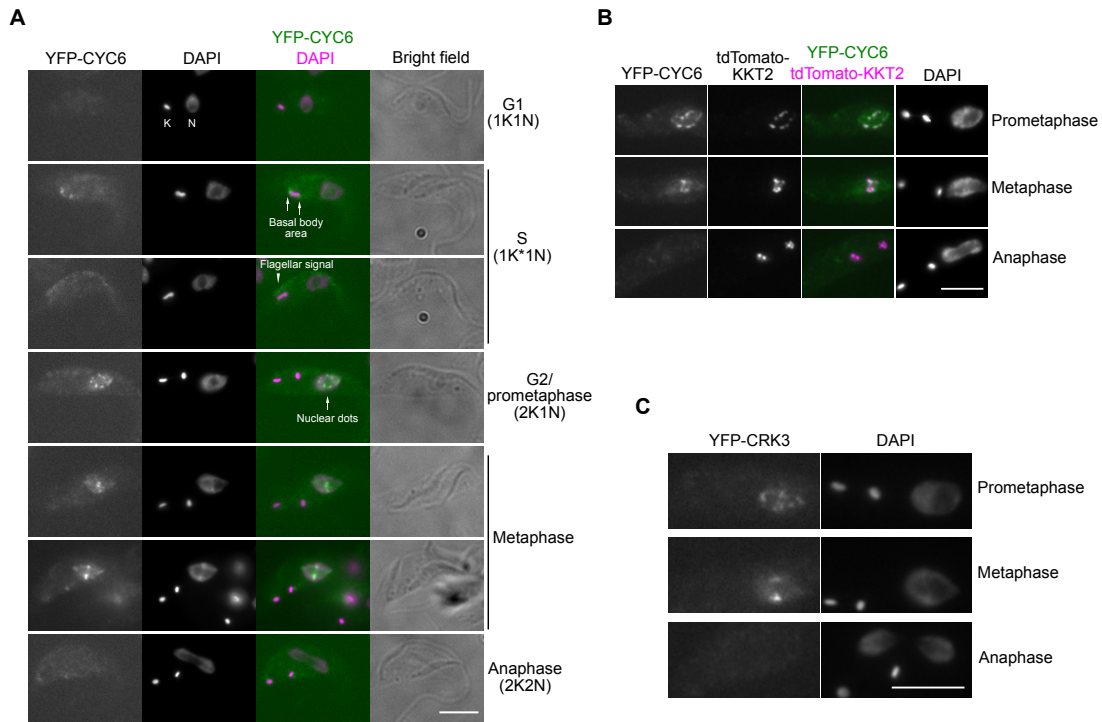

417

418

419 **Figure 1. Cyclin B<sup>CYC6</sup> is enriched at kinetochores in metaphase and disappears**  
420 **in anaphase**

421 (A) CYC6 has a dynamic localization pattern during the cell cycle. Examples of  
422 procyclic form cells that express YFP-CYC6 are shown (cell line BAP426). K and N  
423 stands for the kinetoplast and nucleus, respectively.

424 (B) CYC6 nuclear dots partially co-localize with a kinetochore protein, KKT2  
425 (BAP1005).

426 (C) CRK3 has nuclear dots in metaphase and disappears in anaphase (BAP463).

427 Bars, 5  $\mu$ m.

Figure 2

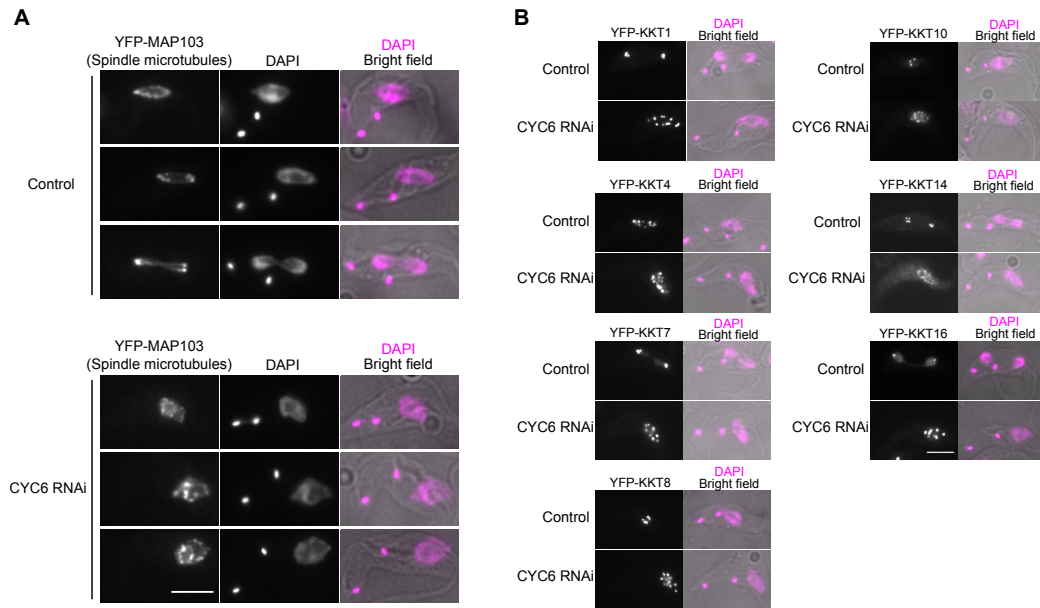

428

429

430 **Figure 2. Cyclin B<sup>CYC6</sup> is important for bipolar spindle assembly, but**  
431 **dispensable for kinetochore assembly**

432 (A) Bipolar spindle formation was perturbed upon induction of CYC6 RNAi. Cells  
433 expressing YFP-MAP103 (a marker for spindle microtubules) were fixed at 24 hr  
434 post-induction (BAP504).

435 (B) Kinetochore localization of KKT1, KKT4, KKT7, KKT8, KKT10, KKT14, and  
436 KKT16 proteins was not affected by CYC6 depletion (BAP503, BAP585, BAP505,  
437 BAP593, BAP596, BAP506, and BAP604, respectively). Examples of 2K1N  
438 (prometaphase/metaphase) or 2K2N (anaphase) cells expressing indicated YFP-KKT  
439 proteins fixed at 24 hr post-induction are shown.

440 Bars, 5  $\mu$ m.



Figure 3

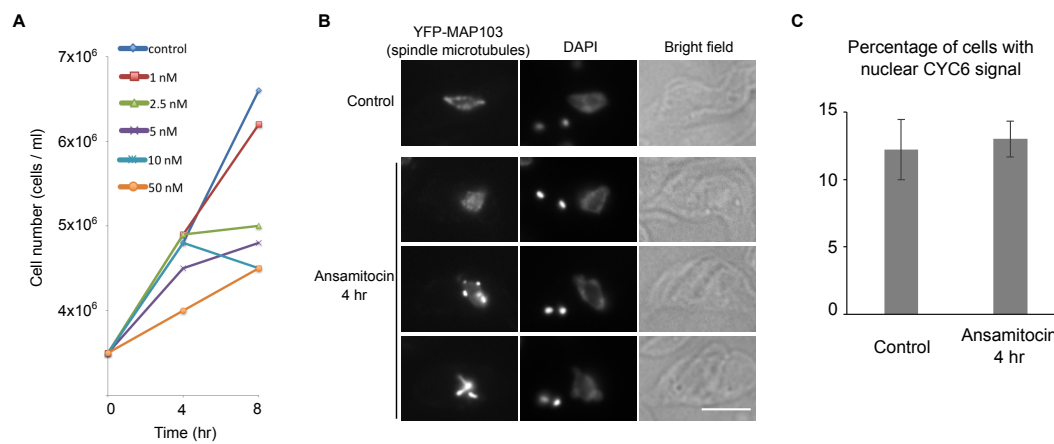

441

442

443 **Figure 3. Spindle assembly defects do not cause cyclin B<sup>CYC6</sup> accumulation in the**  
444 **nucleus**

445 (A) Growth curves of control and ansamitocin-treated cultures show a concentration-  
446 dependent growth inhibition (BAP125).

447 (B) Ansamitocin prevents bipolar spindle assembly. Cells expressing YFP-MAP103  
448 (BAP79) were treated with 5 nM ansamitocin for 4 hr and fixed. Bar, 5  $\mu$ m.

449 (C) Ansamitocin treatment does not result in the accumulation of nuclear CYC6-  
450 positive cells. Cells expressing YFP-CYC6 (BAP426) were treated with 5 nM  
451 ansamitocin for 4 hr and fixed. Three hundred cells were counted for each sample,  
452 and experiments were performed three times. Error bars represent standard deviation.

Figure 4

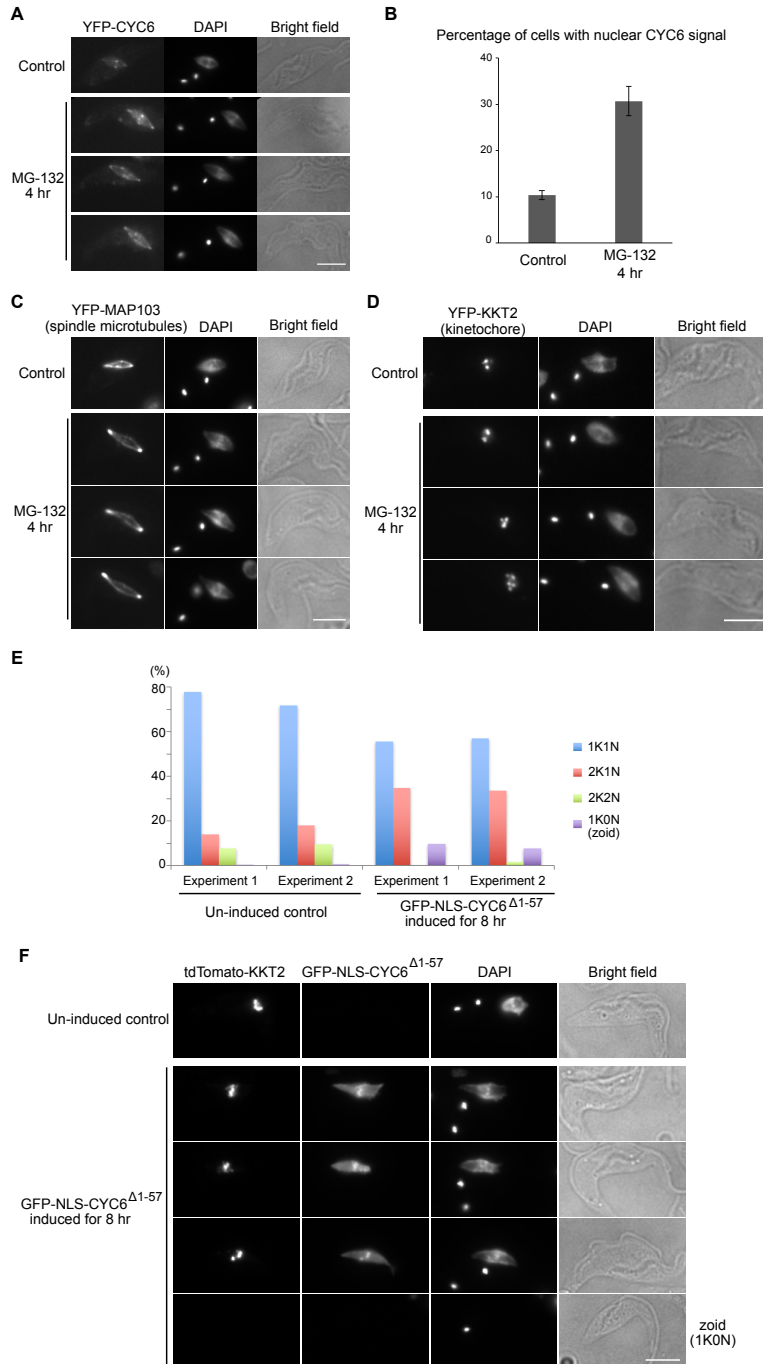

453

454

455 **Figure 4. Cyclin B<sup>CYC6</sup> prevents nuclear division**

456 (A–D) MG-132 treatment causes metaphase arrest. Cells expressing YFP-CYC6 (A,

457 B: BAP426), YFP-MAP103 (C: BAP79), or YFP-KKT2 (D: BAP122) were treated

458 with 10  $\mu$ M MG-132 for 4 hr and fixed, showing that a higher ratio of cells have

459 nuclear CYC6 signal with a bipolar spindle and aligned kinetochores upon MG-132

460 treatment. For quantification of nuclear CYC6-positive cells (B), 300 cells were

461 counted for each sample, and experiments were performed three times. Error bars  
462 represent standard deviation.  
463 (E, F) Expression of a non-degradable CYC6 protein in the nucleus delays nuclear  
464 division. GFP-NLS-CYC6<sup>Δ1-57</sup> expression was induced with 0.1 μg/ml doxycycline in  
465 cells that have tdTomato-KKT2 (BAP945) for 8 hr. Four hundred cells were counted  
466 for each sample, and experiments were performed twice.  
467 Bars, 5 μm.

## Supplemental material, Hayashi and Akiyoshi

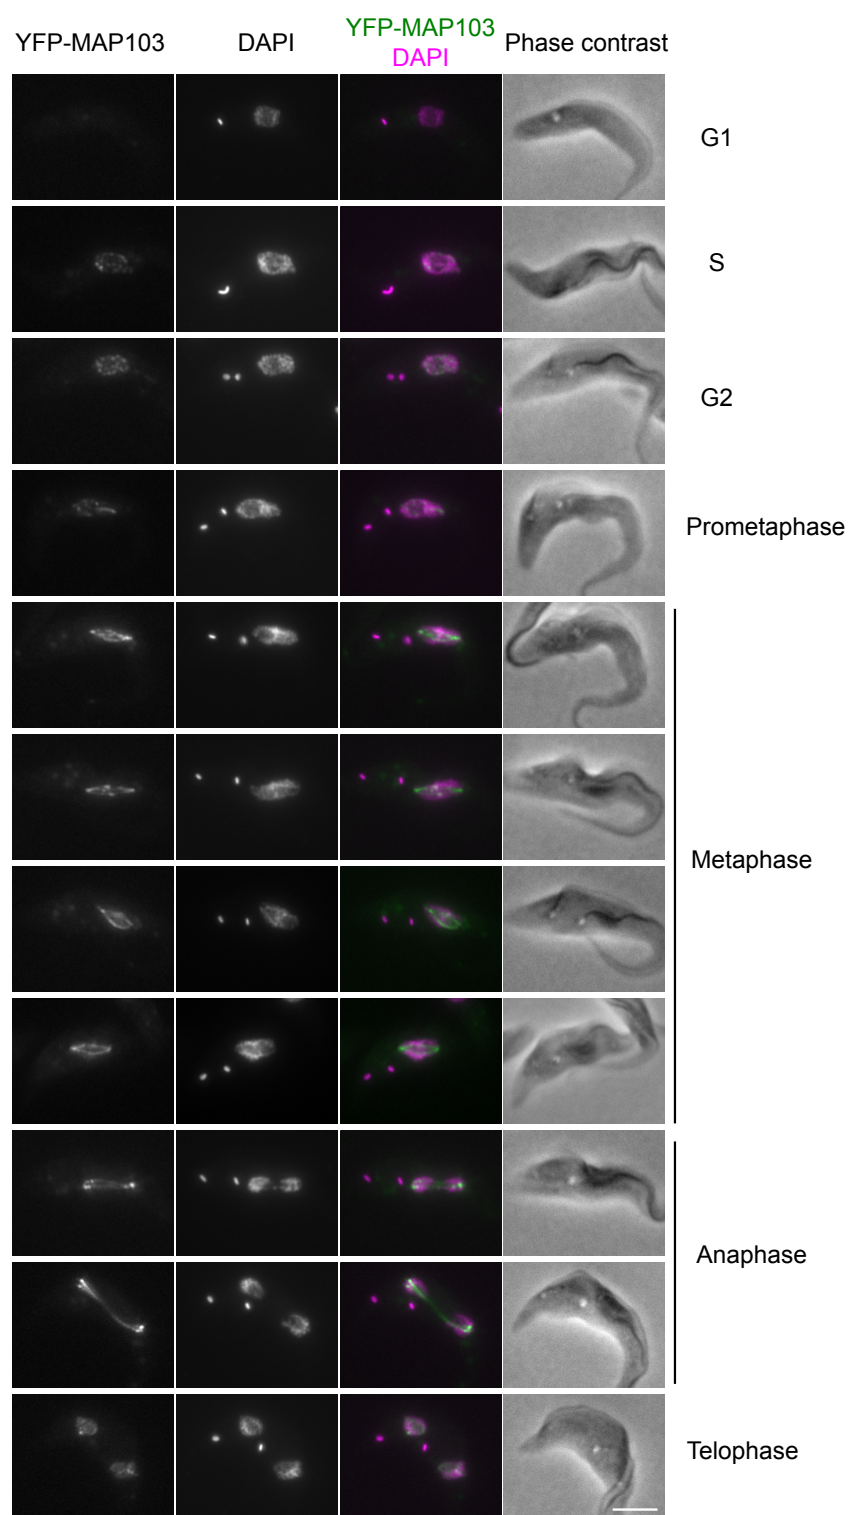

**Figure S1. MAP103 localizes onto spindle microtubules during mitosis**

Examples of cells expressing YFP-MAP103 at indicated cell cycle stages are shown.

Bar, 5  $\mu$ m.

**Table S1. Trypanosome cell lines used in this study.**

| Strain  | Description                                                            |
|---------|------------------------------------------------------------------------|
| SmOxP9  | Parental cell line that expresses TetR and T7 RNAP (Kelly et al. 2007) |
| BAP79   | TY-YFP-MAP103 (this study)                                             |
| BAP122  | TY-YFP-KKT2 (Akiyoshi and Gull 2014)                                   |
| BAP125  | TY-YFP-KKT4 (Akiyoshi and Gull 2014)                                   |
| BAP426  | 3FLAG-6HIS-YFP-CYC6 (this study)                                       |
| BAP463  | 3FLAG-6HIS-YFP-CRK3 (this study)                                       |
| BAP503  | TY-YFP-KKT1, Inducible CYC6 RNAi (this study)                          |
| BAP504  | TY-YFP-MAP103, Inducible CYC6 RNAi (this study)                        |
| BAP505  | TY-YFP-KKT7, Inducible CYC6 RNAi (this study)                          |
| BAP506  | TY-YFP-KKT14, Inducible CYC6 RNAi (this study)                         |
| BAP585  | TY-YFP-KKT4, Inducible CYC6 RNAi (this study)                          |
| BAP593  | TY-YFP-KKT8, Inducible CYC6 RNAi (this study)                          |
| BAP596  | TY-YFP-KKT10, Inducible CYC6 RNAi (this study)                         |
| BAP604  | TY-YFP-KKT16, Inducible CYC6 RNAi (this study)                         |
| BAP945  | TY-tdTomato-KKT2, Inducible GFP-NLS-CYC6 <sup>Δ1-57</sup> (this study) |
| BAP1005 | 3FLAG-6HIS-YFP-CYC6, TY-tdTomato-KKT2 (this study)                     |

**Table S2. Plasmids used in this study.**

| Name     | Descriptions                                                               |
|----------|----------------------------------------------------------------------------|
| pEnT5-Y  | TY-YFP tagging vector, Hygromycin (Kelly et al. 2007)                      |
| p2T7-177 | Inducible RNAi vector, integrate at 177 bp repeats (Wickstead et al. 2002) |
| pBA18    | TY-YFP-KKT1 tagging vector, Hygromycin (Akiyoshi and Gull 2014)            |
| pBA31    | TY-YFP-MAP103 tagging vector, Hygromycin (this study)                      |
| pBA67    | TY-YFP-KKT2 tagging vector, Hygromycin (Akiyoshi and Gull 2014)            |
| pBA68    | TY-YFP-KKT8 tagging vector, Hygromycin (Akiyoshi and Gull 2014)            |
| pBA71    | TY-YFP-KKT4 tagging vector, Hygromycin (Akiyoshi and Gull 2014)            |
| pBA72    | TY-YFP-KKT7 tagging vector, Hygromycin (Akiyoshi and Gull 2014)            |
| pBA74    | TY-YFP-KKT10 tagging vector, Hygromycin (Akiyoshi and Gull 2014)           |
| pBA96    | TY-YFP-KKT16 tagging vector, Hygromycin (Akiyoshi and Gull 2014)           |
| pBA97    | TY-YFP-KKT14 tagging vector, Hygromycin (Akiyoshi and Gull 2014)           |

|         |                                                                                                        |
|---------|--------------------------------------------------------------------------------------------------------|
| pBA106  | 3FLAG-6HIS-YFP tagging vector, Hygromycin (this study)                                                 |
| pBA148  | TY-tdTomato tagging vector, Blasticidin (Akiyoshi and Gull 2014)                                       |
| pBA164  | TY-tdTomato-KKT2 tagging vector, Blasticidin (Nerusheva and Akiyoshi 2016)                             |
| pBA310  | Inducible expression vector, integrate at 177 bp, Phleomycin (Nerusheva and Akiyoshi 2016)             |
| pBA586  | 3FLAG-6HIS-YFP-CYC6 tagging vector, Hygromycin (this study)                                            |
| pBA670  | 3FLAG-6HIS-YFP-CRK3 tagging vector, Hygromycin (this study)                                            |
| pBA734  | p2T7-177, CYC6 RNAi, integrate at 177 bp, Phleomycin (this study)                                      |
| pBA1319 | Inducible GFP-NLS-CYC6 <sup>Δ1-57</sup> expression vector, integrate at 177bp, Phleomycin (this study) |

**Table S3. Primers and synthetic DNA sequences used in this study.**

| To make | Primer (all are listed 5' to 3') or synthetic DNA sequences                                                                                                                                                                                                                                                                                                                    |
|---------|--------------------------------------------------------------------------------------------------------------------------------------------------------------------------------------------------------------------------------------------------------------------------------------------------------------------------------------------------------------------------------|
| pBA31   | MAP103 coding sequence (CDS) targeting sequence with <i>Xba</i> I and <i>Not</i> I<br>BA140: gatcgatc TCTAGA GGAGCAGGT TCCAAGGAGGCTCCACATCG<br>BA141: gatcgatc GCGGCCGC ACAAGATGAGAAGCCCTTTC<br>MAP103 5'UTR targeting sequence with <i>Not</i> I and <i>Bam</i> HI<br>BA142: gatcgatc GCGGCCGC GAAATATTGGTCTTTAAGTC<br>BA143: gatcgatc GGATCC AACCGCTACAGCTATAGTAA            |
| pBA106  | 3FLAG-6HIS tag with <i>Hind</i> III and <i>Spe</i> I cut sequences<br>BA403: AGCTT<br>ATGGATTACAAGGATGACGACGATAAGGATTACAAGGATGACGACGAT<br>AAGGATTACAAGGATGACGACGATAAG CACCATCACCATCACCAT A<br>BA404: CTAGT<br>ATGGTGATGGTGATGGTGCTTATCGTCGTCATCCTTGTAATCCTTATCGT<br>CGTCATCCTTGTAATCCTTATCGTCGTCATCCTTGTAATCCAT A                                                              |
| pBA586  | CYC6 CDS targeting sequence with <i>Xba</i> I and <i>Not</i> I<br>BA977: gatcgatc TCTAGA GGAGCAGGT AATCCCACGGCACTTCGTGA<br>BA978: gatcgatc GCGGCCGC ATACCGGATTATTCTCACGA<br>CYC6 5'UTR targeting sequence with <i>Not</i> I and <i>Bam</i> HI<br>BA979: gatcgatc GCGGCCGC CATTAGTTGAACGTCTAACG<br>BA980: gatcgatc GGATCC TGCCGTGCAGGACCCCTAAT                                  |
| pBA670  | Synthetic DNA for the N-terminal tagging target sequence for CRK3 with <i>Xba</i> I and <i>Bam</i> HI<br>TCTAGA GGAGCAGGT<br>acaatgcttggggcgtaaccggtcgacaacttctctggtcttaaggatcagttcgaccgctataatcgaatggacatac<br>ttggagaaggacgtatggagttgtgtaccgtgctgttgacagggcaacgggacagatcgtcgactgaagaaagtga<br>gattagatcgcaccgatgaggaatacctcaaacagctcttcgggaggtatctatcttgaagaaatccatcacccaaca |



ttgtaGCGGCCGCtctgtatttagctatgatctcactatttccctcttttcttctggtgggtgtgtacctagcgaatgtttac  
ctcgacaattctcggtcgagggggctaagggcgggttctaccctatcaatctttgaaagaagttatgggtgtctcctctac  
cttcattattgcaaggtggttctacataaaattttttttgtctctgcttctcttaagttcttcaggaaacgtaggtgaa  
ggaggagat GGATCC

pBA734 CYC6 coding sequence (378 – 801 bp) with *SpeI* and *HindIII*  
BA1249: gatcgatc ACTAGT AATGATTCTCGTCGATTGGC  
BA1250: actgactg AAGCTT CTGCGATTGGATCTGCTGTA

pBA1319 CYC6 coding sequence (172–1278 bp) with *PacI* and *AscI*  
BA1825: gatc TTAATTAA G TACAGCCCCGTAGGTACGGC  
BA1828: gatc GGCGCGCC CTA AAAGTCAGGTACTIONACTAG

---

### Supplemental references

**Akiyoshi B., Gull K.** (2014) Discovery of unconventional kinetochores in kinetoplastids. *Cell* **156**, 1247–1258. doi: 10.1016/j.cell.2014.01.049

**Kelly S., Reed J., Kramer S., Ellis L., Webb H., Sunter J., Salje J., Marinsek N., Gull K., Wickstead B., et al.** (2007) Functional genomics in *Trypanosoma brucei*: a collection of vectors for the expression of tagged proteins from endogenous and ectopic gene loci. *Mol Biochem Parasitol* **154**, 103–109. doi: 10.1016/j.molbiopara.2007.03.012

**Nerusheva O. O., Akiyoshi B.** (2016) Divergent polo box domains underpin the unique kinetoplastid kinetochore. *Open Biol* **6**, 150206. doi: 10.1098/rsob.150206

**Wickstead B., Ersfeld K., Gull K.** (2002) Targeting of a tetracycline-inducible expression system to the transcriptionally silent minichromosomes of *Trypanosoma brucei*. *Mol Biochem Parasitol* **125**, 211–216.
